# Supplementary material for: Interventions to Increase Initial Appointment Attendance in Mental Health Services: A Systematic Review
Source: Atypon-hosted journal article supplement (doi:10.1176/appi.ps.201200540), 2013-09-16
Supplement: 1249_ds001.pdf [file 1249_ds001.pdf]

Online appendix 1. PRISMA Flow Diagram

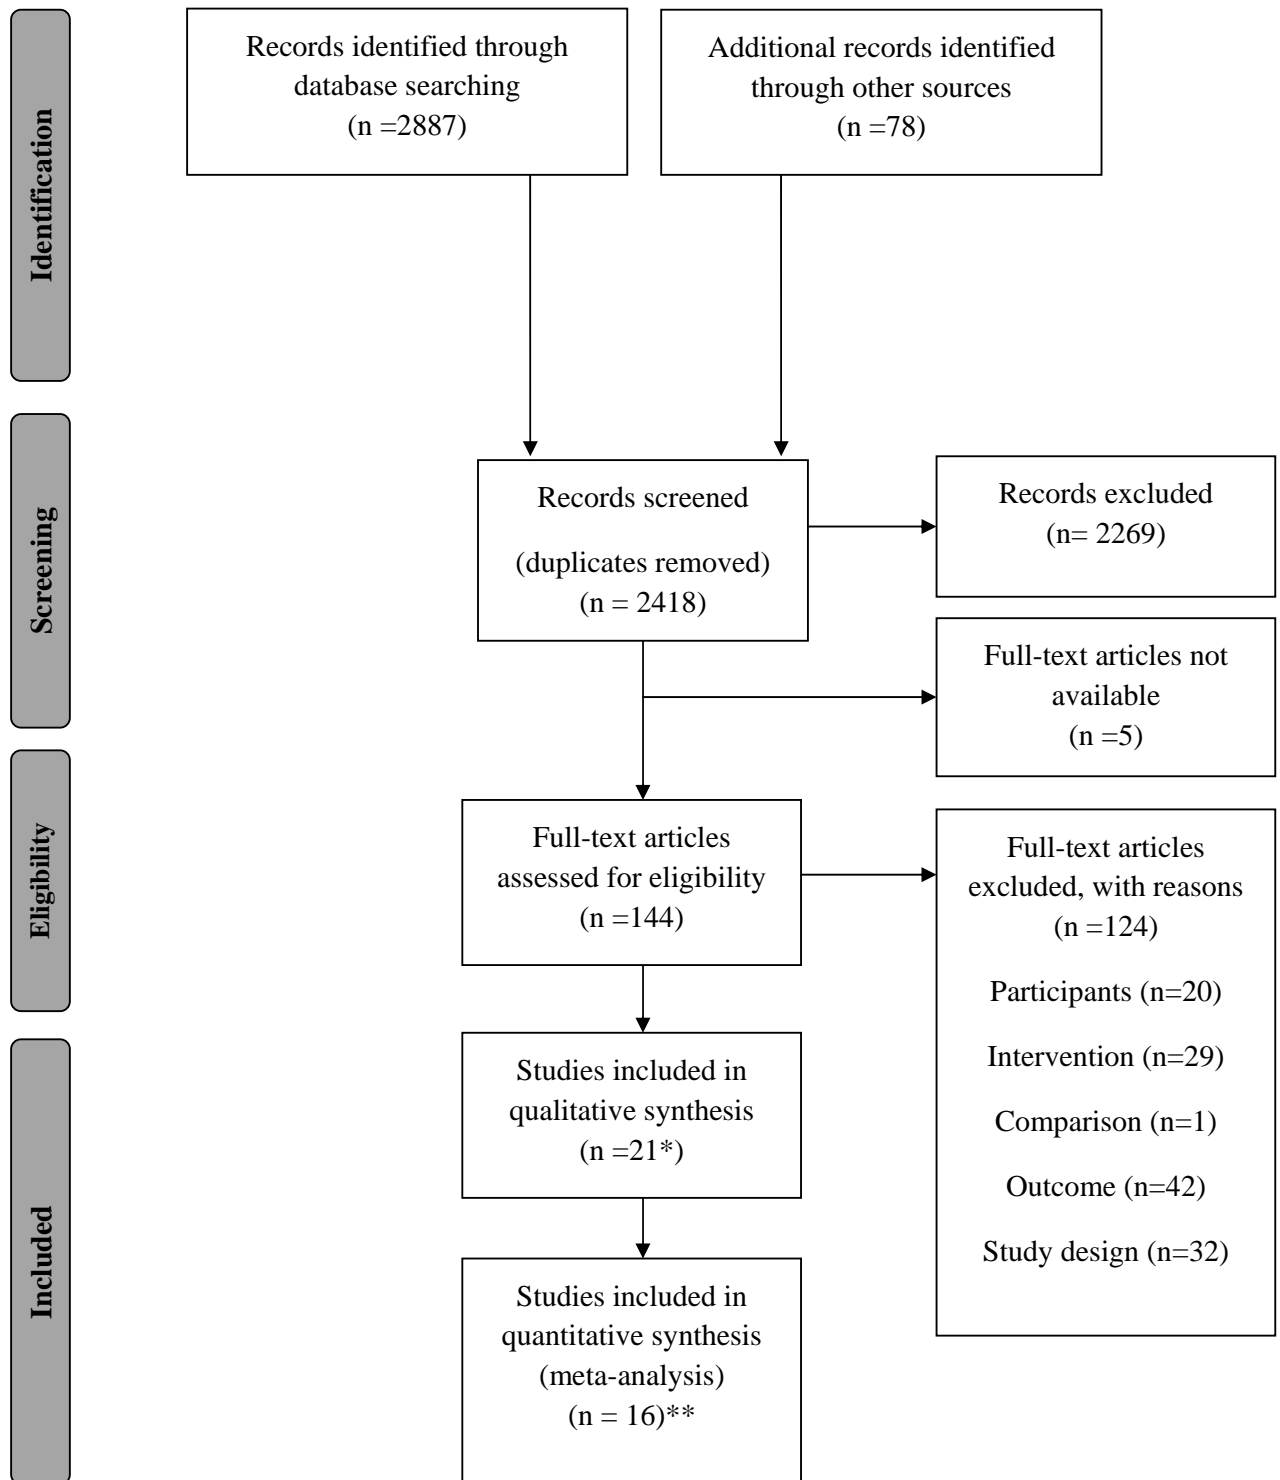

\*one report contained two studies

\*\*the numbers concern the analyses for the primary outcome only

**Online appendix.** Details of interventions and control.

| <b>Study</b>                                    | <b>Details of the intervention</b>                                                                                                                                                                                                                                             | <b>Details of the control condition</b>                                                                                                   |
|-------------------------------------------------|--------------------------------------------------------------------------------------------------------------------------------------------------------------------------------------------------------------------------------------------------------------------------------|-------------------------------------------------------------------------------------------------------------------------------------------|
| Baggaley (1),<br>1993                           | Letter explaining that the patient had been referred to the service. Asked to return a form if wished to be seen. Once they had contacted the clinic, they were sent an appointment.                                                                                           | Brief pre-printed letter with directions to the clinic.                                                                                   |
| Huws (2),<br>1992                               | The patient was sent a short questionnaire, stamped envelope and details about the clinic and the treatment. Patients who returned the questionnaire within four weeks were sent an appointment.                                                                               | Patients were sent an appointment only                                                                                                    |
| Kenwright<br>and Marks<br>(3), 2003<br>Study 1  | "Partial booking method": Patients sent a standard letter with a reply slip and a pre-paid envelope. Clinician usually phoned when received the reply slip (some patients received appointment without phone contact). Letter was then sent to confirm the appointment.        | Standard letter with an assigned appointment sent with a reply slip <i>and a prepaid envelope</i> . Returning the slip was not necessary. |
| Kenwright<br>and Marks.<br>(3), 2003<br>Study 2 | "Partial booking method": Patients sent a standard letter with a reply slip and a pre-paid envelope. Clinician usually phoned when he/she received the reply slip (some patients received appointment without phone contact). Letter was then sent to confirm the appointment. | Standard letter with an assigned appointment sent with a reply slip. Returning the slip was not necessary.                                |

**Telephone prompts/reminders**

|                              |                                                                                                                                                                                                                                                                                                       |                                             |
|------------------------------|-------------------------------------------------------------------------------------------------------------------------------------------------------------------------------------------------------------------------------------------------------------------------------------------------------|---------------------------------------------|
| Burgoyne et<br>al. (4), 1983 | Patients received a phone call around noon from the research assistant advising them about the date, time and place of their appointment (standardized). If there was no answer, the patient was called the following day after 3:00 p.m. The intervention was delivered both in Spanish and English. | Patients were not given a telephone prompt. |
| Crespo-<br>Iglesias (5),     | The patients received a phone call from the administrative staff three days or less before the appointment. The patients were queried if they                                                                                                                                                         | Standard procedure: no telephone prompt     |

Running head: Interventions to Increase Initial Appointment Attendance

|                              |                                                                                                                                                                                                                                                                        |                                                                                                                                                    |
|------------------------------|------------------------------------------------------------------------------------------------------------------------------------------------------------------------------------------------------------------------------------------------------------------------|----------------------------------------------------------------------------------------------------------------------------------------------------|
| 2006                         | had any questions regarding the location and directions to the health centre.                                                                                                                                                                                          |                                                                                                                                                    |
| Gariti et al. (6), 1995      | Patient received a phone call the day before the initial appointment from a trained receptionist. Patient was informed of this at initial telephone screening.                                                                                                         | Regular procedure: patients only encouraged to attend at initial telephone screening.                                                              |
| Hershorn and Rivas (7), 1993 | The patients received a call from the clinician one to three days before the appointment. Three attempts were made to confirm the appointments.                                                                                                                        | No contact                                                                                                                                         |
| Kluger and Karras (8), 1983  | The patient was read an orientation statement when they first phoned the clinic. The statement described the first appointment and gave information about payment and insurance policies. The patient was telephoned 24 hours before their appointment to remind them. | Any questions the patient had were answered when they first contacted the clinic. No telephone reminder or orientation statement was administered. |
| MacDonald et al. (9), 2000   | Clerical staff telephoned the patient to remind him/her about the appointment. No messages were left.                                                                                                                                                                  | Appointment card posted to the patient 1-8 weeks before the appointment                                                                            |

**Orientation/reminder letters**

|                             |                                                                                                                                                                                                                                                   |                                                                                                                            |
|-----------------------------|---------------------------------------------------------------------------------------------------------------------------------------------------------------------------------------------------------------------------------------------------|----------------------------------------------------------------------------------------------------------------------------|
| Kitcheman et al. (10), 2007 | An appointment card and an individualized pro-forma letter sent to patients 72 hours before the first scheduled appointment. This included description to the clinic, a map and a request to bring a family member and any medication with them.* | Appointment card sent to patient.*                                                                                         |
| Rusius (11), 1995           | "Usual system" and an patient was sent an added postal reminder 3 days before the appointment.                                                                                                                                                    | "Usual system": Standard appointment letter sent within two weeks of the referral. Appointments were up to 3 months later. |

Running head: Interventions to Increase Initial Appointment Attendance

|                           |                                                                                                                                                                                                                                                                                                                                                                                                                                                                     |                                                                                                                                        |
|---------------------------|---------------------------------------------------------------------------------------------------------------------------------------------------------------------------------------------------------------------------------------------------------------------------------------------------------------------------------------------------------------------------------------------------------------------------------------------------------------------|----------------------------------------------------------------------------------------------------------------------------------------|
| Swenson et al. (12), 1988 | An orientation letter sent to the patient one day before the appointment that detailed what was going to happen during the first meeting.                                                                                                                                                                                                                                                                                                                           | The patients received only an appointment time and received no orientation letters or letter prompts.                                  |
| Webster (13), 1992        | Patients was sent and information sheet with the standard appointment letter.                                                                                                                                                                                                                                                                                                                                                                                       | Patient was only sent a standard appointment letter.                                                                                   |
| Witkower (14), 1981       | The patient received the standard telephone intake interview and was also sent an "applicant contact letter" and an "applicant reminder letter". The "applicant contact letter" briefly confirmed that the patients application was being evaluated by the team, but that there may be period of waiting. The "applicant reminder letter" briefly reminded the patient about their appointment and asked them to contact the service if they were unable to attend. | Patient had a standard telephone intake interview, where it was determined whether the patient was appropriate for the service or not. |

**Accelerated intake**

|                                   |                                                                                                                                                                                                                                                                          |                                                                                                                                                                                        |
|-----------------------------------|--------------------------------------------------------------------------------------------------------------------------------------------------------------------------------------------------------------------------------------------------------------------------|----------------------------------------------------------------------------------------------------------------------------------------------------------------------------------------|
| Stark et al. (15), 1990           | The patient who phoned and requested an appointment was given a same day appointment by the admissions counsellor. There was also a brief discussion about obstacles to attending and the counselor helped the patient to generate solution to overcome these obstacles. | The patient, who phoned and requested an appointment, was given an appointment within the next 14 days by the admissions counselor. There was no discussion of obstacles to attending. |
| Stasiewicz and Stalker (16), 1999 | The patients had a brief telephone intake interview and were given an appointment within the next 48 hours.                                                                                                                                                              | Patients had a brief telephone intake interview and were given an appointment in 48 hours or more.                                                                                     |

**Psychodynamic questionnaire**

|                       |                                                                                                                                                                                                                                                                     |                                                |
|-----------------------|---------------------------------------------------------------------------------------------------------------------------------------------------------------------------------------------------------------------------------------------------------------------|------------------------------------------------|
| O'Loughlin (17), 1990 | The patient was sent a "psychodynamic" questionnaire before the first appointment. This 12 page questionnaire consisted of mainly open ended questions of current problems, previous coping strategies, past relationships with parents, current relationships etc. | The patient was only sent an appointment card. |
|-----------------------|---------------------------------------------------------------------------------------------------------------------------------------------------------------------------------------------------------------------------------------------------------------------|------------------------------------------------|

Running head: Interventions to Increase Initial Appointment Attendance

|                                  |                                                                                                                                                                          |                                                        |
|----------------------------------|--------------------------------------------------------------------------------------------------------------------------------------------------------------------------|--------------------------------------------------------|
| Soutter and Garelick. (18), 1999 | Patient was sent a "psychodynamic" questionnaire, similar to that used by O'Loughlin, along with a standard appointment letter of the time and place of the appointment. | Patient received only the standard appointment letter. |
|----------------------------------|--------------------------------------------------------------------------------------------------------------------------------------------------------------------------|--------------------------------------------------------|

**Other**

|                                     |                                                                                                                                                                                                          |                                                                                                                                                                                                                      |
|-------------------------------------|----------------------------------------------------------------------------------------------------------------------------------------------------------------------------------------------------------|----------------------------------------------------------------------------------------------------------------------------------------------------------------------------------------------------------------------|
| Ersner-Hershfield et al. (19), 1979 | Patient who called the clinic for an appointment was first asked routine information and then was read a description of two types of therapists (active and reflective) and given a choice between them. | The patient was asked routine information and then told about various clinical services and modalities that were offered at the clinic. The patient was then given an appointment with the next available therapist. |
|-------------------------------------|----------------------------------------------------------------------------------------------------------------------------------------------------------------------------------------------------------|----------------------------------------------------------------------------------------------------------------------------------------------------------------------------------------------------------------------|

|                           |                                                                                                                                                                                                                                                                                                                                                                                                                                                                                                                                                                                                                                                                                                    |                                                                                       |
|---------------------------|----------------------------------------------------------------------------------------------------------------------------------------------------------------------------------------------------------------------------------------------------------------------------------------------------------------------------------------------------------------------------------------------------------------------------------------------------------------------------------------------------------------------------------------------------------------------------------------------------------------------------------------------------------------------------------------------------|---------------------------------------------------------------------------------------|
| Sheeran et al. (20), 2007 | Questionnaire regarding attendance sent with an "Implementation Intention" paragraph at the end of the questionnaire sent to the patients: "People can sometimes feel concerned about attending their appointment. To help you to manage these concerns, please read the statement below 3 times and repeat it silently to yourself one more time: As soon as I feel concerned about attending my appointment, I will ignore that feeling and tell myself this is perfectly understandable! Now please tick the box below if you have read the statement 3 times and said it to yourself once (please be honest, do not tick the box until you have read and repeated the statement)." (p.857-858) | Questionnaire regarding attendance sent without "Implementation intention" paragraph. |
|---------------------------|----------------------------------------------------------------------------------------------------------------------------------------------------------------------------------------------------------------------------------------------------------------------------------------------------------------------------------------------------------------------------------------------------------------------------------------------------------------------------------------------------------------------------------------------------------------------------------------------------------------------------------------------------------------------------------------------------|---------------------------------------------------------------------------------------|

47% of both arms received partial booking method system in addition.

**References**

1. Baggaley M: Improving the attendance for new psychiatric out-patient referrals. *Psychiatric Bulletin* 17:347-348,1993.
2. Huws R: Non-attendances at a marital and sexual difficulties clinic: a controlled intervention study. *International Journal of Social Psychiatry* 38(4):304-308,1992.
3. Kenwright M, Marks IM: Improving first attendance for cognitive behaviour therapy by a partial booking appointment method: Two randomised controlled trials. *Journal of Mental Health* 12:385-392,2003a.
4. Burgoyne RW, Acosta FX, Yamamoto J: Telephone prompting to increase attendance at a Psychiatric Outpatient Clinic. *American Journal of Psychiatry* 140:345-347,1983.

Running head: Interventions to Increase Initial Appointment Attendance

5. Crespo-Iglesias J, Garcia, AG., Miguelez, BS., SN Fernandez. : Mejoria de la asistencia a las primeras citas en psiquiatria tras aviso telefonico. *Anales de Psiquiatria* 22:95-101,2006.
6. Gariti P, Alterman AI, Holub-Beyer E, Volpicelli JR, Prentice N, O'Brien CP: Effects of an appointment reminder call on patient show rates. *Journal of Substance Abuse Treatment* 12:207-212,1995.
7. Hershorn M, Rivas A: The effectiveness of pretreatment engagement: Stability and reachability of attenders versus nonattenders for community mental health intakes. *Journal of Community Psychology* 21:21-25,1993.
8. Kluger MP, Karras A: Strategies for reducing missed initial appointments in a community mental health center. *Community Mental Health Journal* 19(2):137-143,1983.
9. MacDonald J, Brown N, Ellis P: Using telephone prompts to improve initial attendance at a community mental health center. *Psychiatric Services* 51:812-814,2000.
10. Kitcheman J, Adams CE, Pervaiz A, Kader I, Mohandas D, Brookes G: Does an encouraging letter encourage attendance at psychiatric out-patient clinics? The Leeds PROMPTS randomized study. *Psychological Medicine* 38:717-723,2008.
11. Rusius CW: Improving out-patient attendance using postal appointment reminders. *Psychiatric Bulletin* 19:291-292,1995.
12. Swenson TR, Pekarik G: Interventions for reducing missed initial appointments at a community mental health center. *Community Mental Health Journal*(3):205-218,1988.
13. Webster A: The effect of pre-assessment information on clients' satisfaction, expectations and attendance at a mental health day centre. *British Journal of Medical Psychology* 65:89-93,1992.
14. Witkower AB: Influence of intake procedures on applicant attrition at a community mental health center. *Dissertation Abstracts International* 41:4697-4698,1981.
15. Stark MJ, Campbell BK, Brinkerhoff CV: "Hello, may we help you?" A study of attrition prevention at the time of the first phone contact with substance-abusing clients. *American Journal of Drug & Alcohol Abuse* 16:67-76,1990.
16. Stasiewicz PR, Stalker R: A comparison of three "interventions" on pretreatment dropout rates in an outpatient substance abuse clinic. *Addictive Behaviors* 24:579-582,1999.
17. O'Loughlin S: The effect of a pre-appointment questionnaire on clinical psychologist attendance rates. *British Journal of Medical Psychology* 63(Pt 1):5-9,1990.
18. Soutter A, Garelick A: What is the role of pre-assessment questionnaires in psychotherapy? *Psychoanalytic Psychotherapy* 13:245-258,1999.
19. Ersner-Hershfield S, Abramowitz SI, Baren J: Incentive effects of choosing a therapist. *Journal of Clinical Psychology* 35:404-406,1979.
20. Sheeran P, Aubrey R, Kellett S: Increasing attendance for psychotherapy: implementation intentions and the self-regulation of attendance-related negative affect. *Journal of Consulting & Clinical Psychology* 75:853-863,2007.

**Online appendix. Forest plots of the studies included in the analyses**

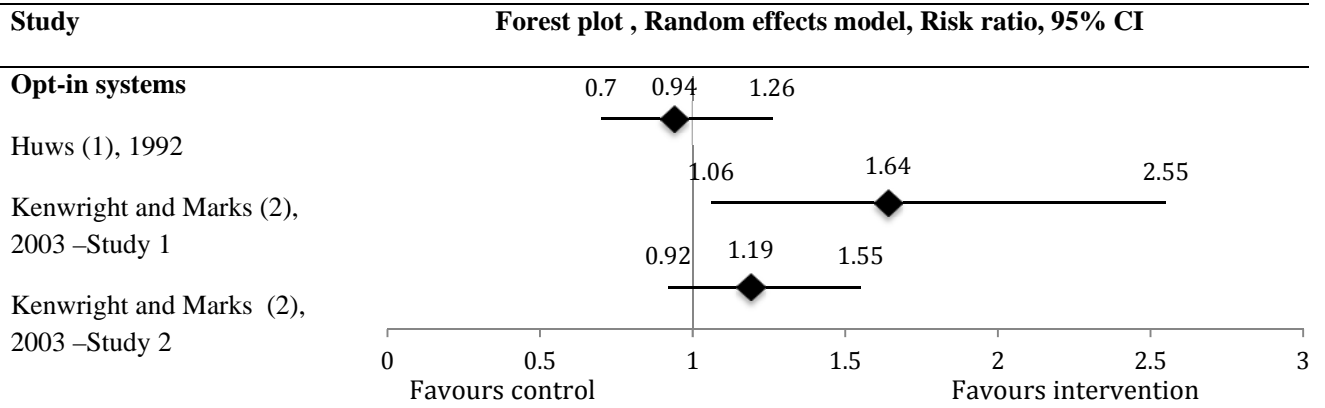

**Orientation/ reminder letters**

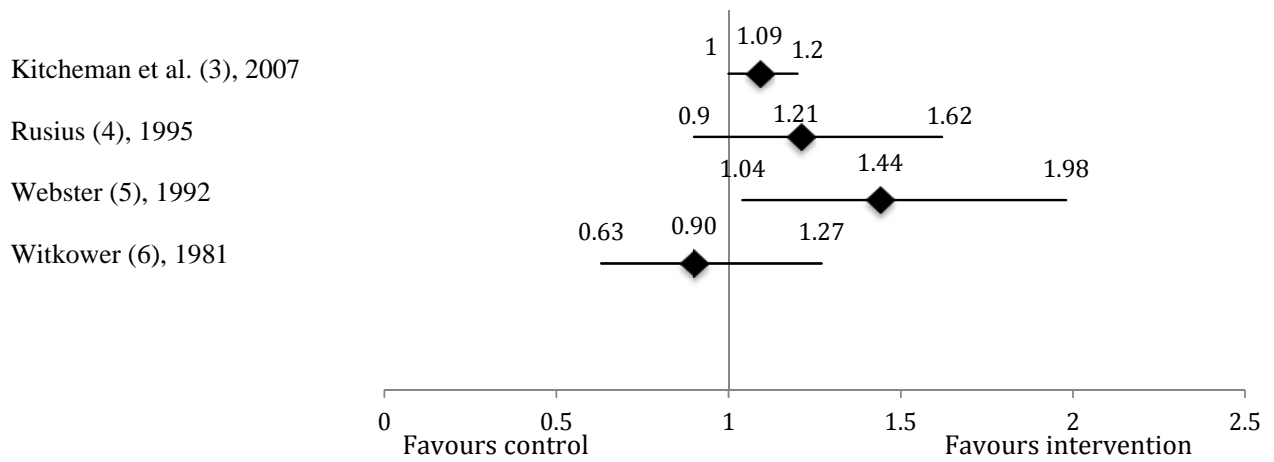

**Telephone prompts and reminders**

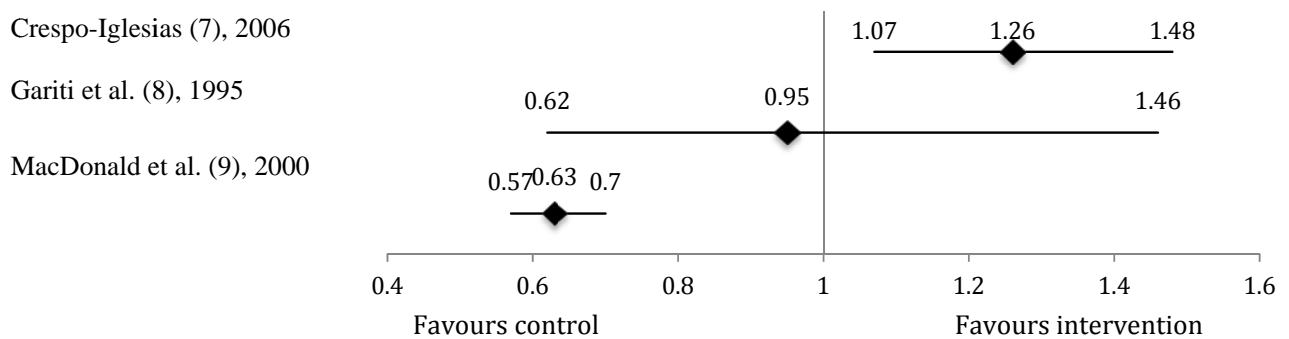

Supplement 4 (continued)

Forest plot , Random effects model, Risk ratio, 95% CI

Accelerated intake

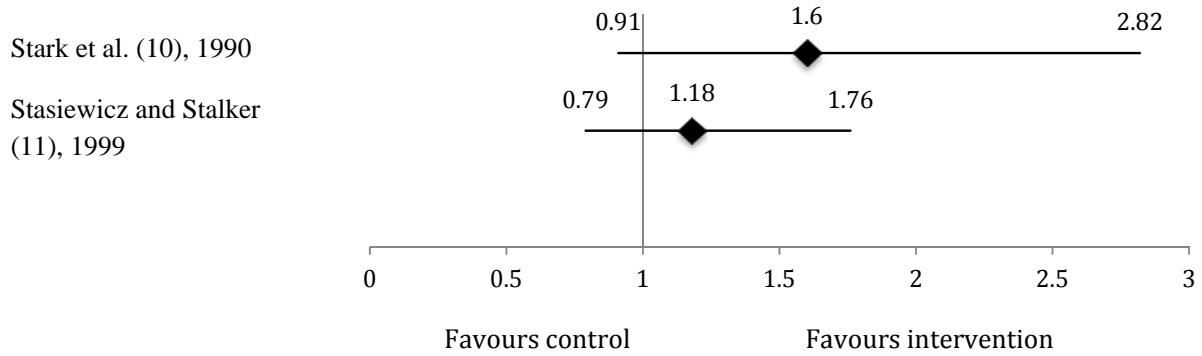

Psychodynamic Questionnaire

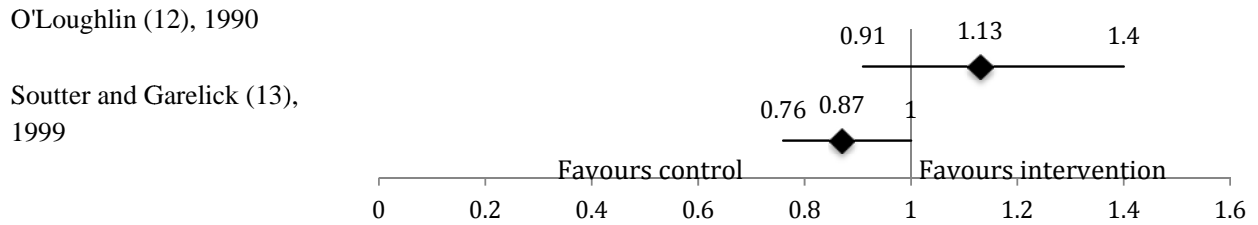

Other

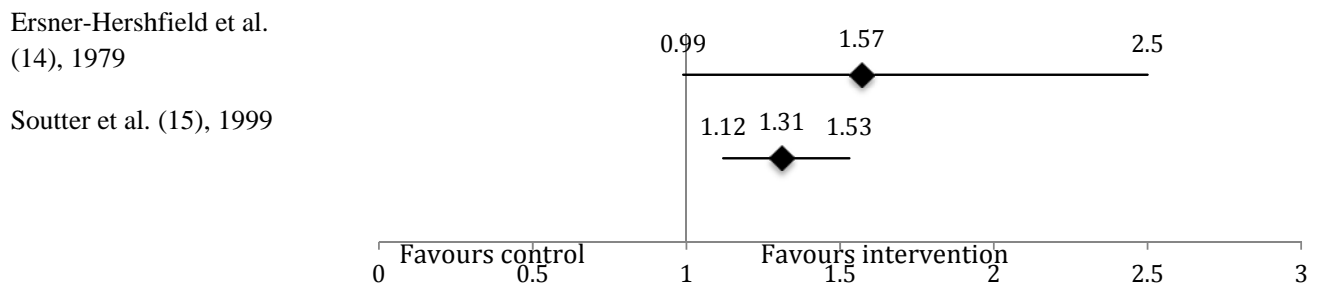



## References

1. Huws R: Non-attendances at a marital and sexual difficulties clinic: a controlled intervention study. *The International journal of social psychiatry*:304-308,1992.
2. Kenwright M, Marks IM: Improving first attendance for cognitive behaviour therapy by a partial booking appointment method: Two randomised controlled trials. *Journal of Mental Health* 12:385-392,2003a.
3. Kitcheman J, Adams CE, Pervaiz A, Kader I, Mohandas D, Brookes G: Does an encouraging letter encourage attendance at psychiatric out-patient clinics? The Leeds PROMPTS randomized study. *Psychological Medicine* 38:717-723,2008.
4. Rusius CW: Improving out-patient attendance using postal appointment reminders. *Psychiatric Bulletin* 19:291-292,1995.
5. Webster A: The effect of pre-assessment information on clients' satisfaction, expectations and attendance at a mental health day centre. *British Journal of Medical Psychology* 65:89-93,1992.
6. Witkower AB: Influence of intake procedures on applicant attrition at a community mental health center. *Dissertation Abstracts International* 41:4697-4698,1981.
7. Crespo-Iglesias J, Garcia, AG., Miguelez, BS., SN Fernandez. : Mejoria de la asistencia a las primeras citas en psiquiatria tras aviso telefonico. *Anales de Psiquiatria* 22:95-101,2006.
8. Gariti P, Alterman AI, Holub-Beyer E, Volpicelli JR, Prentice N, O'Brien CP: Effects of an appointment reminder call on patient show rates. *Journal of Substance Abuse Treatment*:207-212,1995.
9. MacDonald J, Brown N, Ellis P: Using telephone prompts to improve initial attendance at a community mental health center. *Psychiatric Services* 51:812-814,2000.
10. Stark MJ, Campbell BK, Brinkerhoff CV: "Hello, may we help you?" A study of attrition prevention at the time of the first phone contact with substance-abusing clients. *American Journal of Drug & Alcohol Abuse* 16:67-76,1990.
11. Stasiewicz PR, Stalker R: A comparison of three "interventions" on pretreatment dropout rates in an outpatient substance abuse clinic. *Addictive Behaviors* 24:579-582,1999.
12. O'Loughlin S: The effect of a pre-appointment questionnaire on clinical psychologist attendance rates. *British Journal of Medical Psychology* 63:5-9,1990.
13. Soutter A, Garelick A: What is the role of pre-assessment questionnaires in psychotherapy? . *Psychoanalytic Psychotherapy* 13:245-258,1999.
14. Ersner-Hershfield S, Abramowitz SI, Baren J: Incentive effects of choosing a therapist. *Journal of Clinical Psychology* 35:404-406,1979.
15. Soutter A, Garelick A: What is the role of pre-assessment questionnaires in psychotherapy? *Psychoanalytic Psychotherapy* 13:245-258,1999.
